# Supplementary material for: Molecular Docking and Dynamics Simulation Study of Hyrtios erectus Isolated Scalarane Sesterterpenes as Potential SARS-CoV-2 Dual Target Inhibitors
Source: MDPI journal article supplement (doi:10.3390/biology10050389), 2021-05-01
Supplement: s1 [file s1]

# Molecular Docking and Dynamics Simulation Study of *Hyrtios erectus* Isolated Scalarane Sesterterpenes As Potential SARS-CoV-2 Dual Target Inhibitors

Sameh S. Elhady <sup>1,†,\*</sup>, Reda F. A. Abdelhameed <sup>2,†</sup>, Rania T. Malatani <sup>3</sup>, Abdulrahman M. Alahdal <sup>3</sup>, Hanin A. Bogari <sup>3</sup>, Ahmad J. Almalki <sup>4</sup>, Khadijah A. Mohammad <sup>4</sup>, Safwat A. Ahmed <sup>2</sup>, Amgad I. M. Khedr <sup>5,6</sup> and Khaled M. Darwish <sup>7,\*</sup>

<sup>1</sup> Department of Natural Products, Faculty of Pharmacy, King Abdulaziz University, Jeddah 21589, Saudi Arabia; ssahmed@kau.edu.sa

<sup>2</sup> Department of Pharmacognosy, Faculty of Pharmacy, Suez Canal University, Ismailia 41522, Egypt; omarreda\_70@yahoo.com (R.F.A.A.); safwat\_aa@yahoo.com (S.A.A.)

<sup>3</sup> Department of Pharmacy Practice, Faculty of Pharmacy, King Abdulaziz University, Jeddah 21589, Saudi Arabia; rmalatani@kau.edu.sa (R.T.M.); aalahdal2@hotmail.com (A.M.A.); hbogari@kau.edu.sa (H.A.B.)

<sup>4</sup> Department of Pharmaceutical Chemistry, Faculty of Pharmacy, King Abdulaziz University, Jeddah 21589, Saudi Arabia; ajalmalki@kau.edu.sa (A.J.A.); kmohammad@kau.edu.sa (K.A.M.)

<sup>5</sup> Department of Pharmacognosy, Faculty of Pharmacy, Port Said University, Port Said 42526, Egypt; a\_mansour7799@yahoo.com

<sup>6</sup> Department of Pharmacognosy, Faculty of Pharmacy, Horus University-Egypt, New Damietta 34518, Egypt

<sup>7</sup> Department of Medicinal Chemistry, Faculty of Pharmacy, Suez Canal University, Ismailia 41522, Egypt

\* Correspondence: ssahmed@kau.edu.sa (S.S.E.); khaled\_darwish@pharm.suez.edu.eg (K.M.D.);

Tel.: +966-544-512-552 (S.S.E); +20-100-5330-114 (K.M.D.)

† These authors equally contributed to this work.

## Additional Experimental Detail

- 1) **Table S1.** Descriptive ligand/M-pro binding interactions through directed docking protocol.
- 2) **Table S2.** Descriptive ligand/Nsp15 NendoU binding interactions through directed docking protocol.
- 3) **Table S3.** Estimated RMSD and Rg parameter of investigated ligands and reference compound, lopinavir, complexed with M-pro proteins throughout the triplicate all-atom MD simulation.
- 4) **Table S4:** Estimated  $\Delta\text{RMSF}^a$  parameter of ligands/M-pro proteins across stable structure trajectories (last 20 ns).
- 5) **Table S5.** Estimated RMSD and Rg parameter of investigated ligands and reference compound, Benzopurpurin 4B, complexed with Nsp15 NendoU proteins throughout the triplicate all-atom MD simulation.
- 6) **Table S6:** Estimated  $\Delta\text{RMSF}^a$  parameter of ligands/Nsp15 NendoU proteins across stable structure trajectories (last 20 ns).
- 7) **Table S7.** Total binding-free energies and individual energy term ( $\Delta G \pm \text{SD}$ ) of the promising scalarane-based compounds and reference ligands within Nsp15 NendoU and/or M-pro protein binding site, across the three MD simulation runs.
- 8) **Figure S1.** Superimposing the crystallized (green sticks) and redocked (yellow sticks) ligands at (a) M-pro and (b) Nsp15 NendoU for validating the adopted directed docking protocol.
- 9) **Figure S2.** The 3D structural representation of the promising scalarane-based hits (sticks) and reference ligands showing respective pharmacophoric features (mesh spheres) as well as projected virtual points (arrows). Features and directionality of H-bond donor, H-bond acceptor, or aromaticity are colored in violet, cyan, or orange, respectively.

**Table S1.** Descriptive ligand/M-pro binding interactions through directed docking protocol

| Compound  | Ligand-target interaction description<br>[Type; Length (Å); Angle (°); Binding Residues]                                                                                                                                                                                                                                                   |
|-----------|--------------------------------------------------------------------------------------------------------------------------------------------------------------------------------------------------------------------------------------------------------------------------------------------------------------------------------------------|
| 2         | H-bond ; 2.6 Å ; 132 ° ; Glu166 (main chain NH with 12β-OH)<br>H-bond ; 3.1 Å ; 131 ° ; Thr190 (main chain NH with 19α-OC(O)CH <sub>3</sub> )<br>H-bond ; 3.0 Å ; 121 ° ; Gln192 (side chain NH <sub>2</sub> with 19α-OC(O)CH <sub>3</sub> )<br>Sulphur-Dipole ; 3.3 Å ; Thr165 (side chain SCH <sub>3</sub> with 19α-COOCH <sub>3</sub> ) |
| 4         | H-bond ; 3.2 Å ; 157 ° ; Glu166 (main chain NH with 12β-OC(O)CH <sub>3</sub> )                                                                                                                                                                                                                                                             |
| 6         | H-bond ; 2.6 Å ; 126 ° ; Cys145 (side chain SH with 19-C=O)<br>H-bond ; 2.7 Å ; 137 ° ; Glu166 (main chain NH with 12β-OH)<br>π-H interaction ; 3.4 Å ; His41 (side chain)                                                                                                                                                                 |
| 8         | H-bond ; 4.0 Å ; 106 ° ; His41 (side chain NH with 20-CHO)<br>H-bond ; 1.9 Å ; 159 ° ; Glu166 (main chain NH with 12β-OH)<br>Sulphur-Dipole ; 3.4 Å ; Thr165 (side chain SCH <sub>3</sub> with 20-CHO)                                                                                                                                     |
| 11        | H-bond ; 4.0 Å ; 106 ° ; Glu166 (side chain NH <sub>2</sub> with 19-OH)<br>H-bond ; 1.9 Å ; 159 ° ; Thr190 (main chain NH with 12β-OH)<br>H-bond ; 1.9 Å ; 159 ° ; Gln192 (main chain NH with 12β-OH)<br>Sulphur-Dipole ; 3.4 Å ; Thr165 (side chain SCH <sub>3</sub> with 20-CHO)                                                         |
| 12        | H-bond ; 3.5 Å ; 101 ° ; Thr190 (main chain NH with 19-C=O)<br>H-bond ; 4.1 Å ; 93 ° ; Ala191 (main chain NH with 19-C=O)<br>H-bond ; 3.6 Å ; 105 ° ; Gln192 (side chain NH with 12β-OC(O)CH <sub>3</sub> )                                                                                                                                |
| 15        | H-bond ; 3.5 Å ; 117 ° ; Arg188 (main chain NH with 16β-OH)<br>H-bond ; 2.4 Å ; 126 ° ; Arg188 (main chain CO with 16β-OH)<br>H-bond ; 2.3 Å ; 101 ° ; Gln192 (side chain NH <sub>2</sub> with 20-C=O)                                                                                                                                     |
| Lopinavir | H-bond ; 1.9 Å ; 120 ° ; Glu166 (main chain NH with amide linker C=O)<br>H-bond ; 2.1 Å ; 108 ° ; Glu166 (main chain CO with pyrimidine NH)<br>H-bond ; 4.1 Å ; 132 ° ; Gln189 (side chain CO with amide linker NH)                                                                                                                        |

**Table S2.** Descriptive ligand/Nsp15 NendoU binding interactions through directed docking protocol

| Compound            | Ligand-target interaction description<br>[Type; Length (Å); Angle (°); Binding Residues]                                                                                                                                                                                                                                                                                                                       |
|---------------------|----------------------------------------------------------------------------------------------------------------------------------------------------------------------------------------------------------------------------------------------------------------------------------------------------------------------------------------------------------------------------------------------------------------|
| 1                   | H-bond ; 2.3 Å ; 111 ° ; His235 (side chain NH with $\delta$ -lactone O)<br>H-bond ; 2.4 Å ; 135 ° ; Gly248 (main chain NH with $\delta$ -lactone O)<br>H-bond ; 1.8 Å ; 130 ° ; Lys290 (side chain NH <sub>2</sub> with 19-C=O)<br>H-bond ; 3.2 Å ; 101 ° ; Lys290 (side chain NH <sub>2</sub> with 12 $\beta$ -OH)<br>H-bond ; 1.9 Å ; 152 ° ; Tyr343 (side chain OH with 16 $\beta$ -OC(O)CH <sub>3</sub> ) |
| 2                   | H-bond ; 2.3 Å ; 148 ° ; Leu246 (main chain CO with 12 $\beta$ -OH)<br>H-bond ; 1.7 Å ; 161 ° ; Gly248 (main chain NH with 12 $\beta$ -OH)<br>H-bond ; 2.4 Å ; 148 ° ; Lys290 (side chain NHH with 12 $\beta$ -OH)                                                                                                                                                                                             |
| 4                   | H-bond ; 2.4 Å ; 111 ° ; Gly248 (side chain NH with 12 $\beta$ -OC(O)CH <sub>3</sub> )<br>H-bond ; 3.6 Å ; 99 ° ; His250 (main chain NH with $\delta$ -lactone O)<br>H-bond ; 2.9 Å ; 153 ° ; Lys290 (side chain NH <sub>2</sub> with 12 $\beta$ -OC(O)CH <sub>3</sub> )<br>H-bond ; 2.8 Å ; 174 ° ; Ser294 (main chain NH with $\delta$ -lactone O)<br>$\pi$ -H interaction ; 3.8 Å ; Tyr343 (side chain)     |
| 6                   | H-bond ; 1.7 Å ; 141 ° ; Gln245 (side chain NH <sub>2</sub> with 19-C=O)<br>H-bond ; 2.7 Å ; 104 ° ; Leu246 (main chain CO with 12 $\beta$ -OH)<br>H-bond ; 2.9 Å ; 156 ° ; Gly248 (main chain NH with 12 $\beta$ -OH)<br>H-bond ; 2.9 Å ; 136 ° ; Gly248 (main chain NH with 19-C=O)<br>H-bond ; 1.9 Å ; 116 ° ; Lys290 (side chain NH <sub>2</sub> with 12 $\beta$ -OH)                                      |
| 10                  | H-bond ; 2.3 Å ; 113 ° ; Gln245 (side chain NH <sub>2</sub> with 19-C=O)<br>H-bond ; 2.1 Å ; 138 ° ; Gly248 (main chain NH with 19-C=O)<br>H-bond ; 2.8 Å ; 132 ° ; His250 (side chain NH with $\delta$ -lactone O)<br>H-bond ; 2.8 Å ; 148 ° ; Lys290 (side chain NH <sub>2</sub> with $\delta$ -lactone O)<br>H-bond ; 1.7 Å ; 144 ° ; Thr341 (side chain OH with 20-OH)                                     |
| 11                  | H-bond ; 2.1 Å ; 98 ° ; Gln245 (side chain NH with 16 $\alpha$ -OCH <sub>3</sub> )<br>H-bond ; 2.3 Å ; 161 ° ; Gly248 (main chain NH with $\delta$ -lactone O)<br>H-bond ; 2.4 Å ; 114 ° ; Lys290 (side chain NH <sub>2</sub> with 20-C=O)<br>H-bond ; 1.7 Å ; 132 ° ; Tyr343 (side chain OH with 12 $\beta$ -OC(O)CH <sub>3</sub> )                                                                           |
| 12                  | H-bond ; 2.3 Å ; 135 ° ; Gly248 (main chain NH with 12 $\beta$ -OC(O)CH <sub>3</sub> )<br>H-bond ; 2.5 Å ; 97 ° ; Lys290 (side chain NH <sub>2</sub> with 12 $\beta$ -OC(O)CH <sub>3</sub> )<br>H-bond ; 2.3 Å ; 170 ° ; Ser294 (side chain NH with 19-C=O)<br>H-bond ; 2.6 Å ; 123 ° ; Ser294 (side chain NH with $\delta$ -lactone O)<br>$\pi$ -H interaction ; 3.2 Å ; Tyr343 (side chain)                  |
| 15                  | H-bond ; 3.4 Å ; 137 ° ; Gln245 (side chain CO with 19 $\alpha$ -OH)<br>H-bond ; 1.8 Å ; 147 ° ; Gln245 (side chain NHH with 19 $\alpha$ -OH)<br>H-bond ; 2.3 Å ; 163 ° ; Gly248 (main chain NH with 12 $\beta$ -OC(O)CH <sub>3</sub> )<br>H-bond ; 2.6 Å ; 144 ° ; Lys290 (side chain NHH with 12 $\beta$ -OC(O)CH <sub>3</sub> )<br>$\pi$ -H interaction ; 3.2 Å ; Tyr343 (side chain)                       |
| Benzopurpurin<br>4B | H-bond ; 2.1 Å ; 152 ° ; Asp240 (side chain COOH with SO <sub>2</sub> OH)<br>H-bond ; 2.5 Å ; 164 ° ; Asn278 (side chain NHH with SO <sub>2</sub> OH)<br>H-bond ; 2.6 Å ; 159 ° ; Glu340 (side chain COOH with Ar-NH <sub>2</sub> )<br>H-bond ; 2.6 Å ; 164 ° ; Leu346 (main chain NH with SO <sub>2</sub> OH)<br>$\pi$ -H interaction ; 3.1 Å ; Tyr343 (side chain)                                           |

**Table S3.** Estimated RMSD and Rg parameter of investigated ligands and reference compound, lopinavir, complexed with M-pro proteins throughout the triplicate all-atom MD simulation

|                              |                   | Compound 6 / M-pro complex |                        |                       |                      | Compound 15 / M-pro complex |                        |                       |                      | Lopinavir / M-pro complex |                        |                       |                      |
|------------------------------|-------------------|----------------------------|------------------------|-----------------------|----------------------|-----------------------------|------------------------|-----------------------|----------------------|---------------------------|------------------------|-----------------------|----------------------|
|                              |                   | RMSD<br>protein<br>(Å)     | RMSD<br>complex<br>(Å) | RMSD<br>ligand<br>(Å) | Rg<br>complex<br>(Å) | RMSD<br>protein<br>(Å)      | RMSD<br>complex<br>(Å) | RMSD<br>ligand<br>(Å) | Rg<br>complex<br>(Å) | RMSD<br>protein<br>(Å)    | RMSD<br>complex<br>(Å) | RMSD<br>ligand<br>(Å) | Rg<br>complex<br>(Å) |
| 1 <sup>st</sup><br>MD<br>run | Max.              | 3.91                       | 3.96                   | 4.48                  | 23.66                | 5.98                        | 6.02                   | 4.57                  | 23.13                | 4.18                      | 4.91                   | 2.98                  | 22.80                |
|                              | Min.              | 1.52                       | 1.59                   | 0.53                  | 21.71                | 1.45                        | 1.48                   | 0.69                  | 21.61                | 1.39                      | 1.50                   | 0.52                  | 21.87                |
|                              | Mean <sup>a</sup> | 2.58                       | 2.63                   | 2.94                  | 22.41                | 4.30                        | 4.30                   | 2.87                  | 22.20                | 3.10                      | 3.41                   | 2.21                  | 22.31                |
|                              |                   | ±0.24                      | ±0.24                  | ±0.46                 | ±0.27                | ±0.55                       | ±0.49                  | ±0.42                 | ±0.25                | ±0.38                     | ±0.42                  | ±0.30                 | ±0.14                |
| 2 <sup>nd</sup><br>MD<br>run | Max.              | 3.95                       | 4.56                   | 3.72                  | 23.07                | 4.36                        | 4.37                   | 3.97                  | 23.69                | 3.70                      | 3.97                   | 5.60                  | 23.11                |
|                              | Min.              | 1.40                       | 1.43                   | 0.95                  | 21.98                | 1.80                        | 1.81                   |                       | 22.39                | 1.31                      | 1.34                   | 0.88                  | 22.02                |
|                              | Mean <sup>a</sup> | 2.51                       | 3.09                   | 2.52                  | 22.40                | 3.14                        | 3.64                   | 2.74 ±0.3             | 22.95                | 2.70                      | 3.14                   | 3.80                  | 22.54                |
|                              |                   | ±0.34                      | ±0.50                  | ±0.39                 | ±0.16                | ±0.35                       | ±0.34                  |                       | ±0.16                | ±0.41                     | ±0.32                  | ±0.60                 | ±0.14                |
| 3 <sup>rd</sup><br>MD<br>run | Max.              | 4.72                       | 6.72                   | 4.55                  | 23.28                | 5.09                        | 6.55                   | 3.77                  | 23.69                | 4.82                      | 6.23                   | 3.99                  | 22.84                |
|                              | Min.              | 1.43                       | 1.48                   | 0.49                  | 21.91                | 1.54                        | 1.56                   | 0.86                  | 21.93                | 1.48                      | 1.46                   | 0.43                  | 21.93                |
|                              | Mean <sup>a</sup> | 3.42                       | 4.70                   | 2.79                  | 22.43                | 4.22                        | 5.19                   | 2.69                  | 22.78                | 3.74                      | 4.17                   | 2.74                  | 22.41                |
|                              |                   | ±0.59                      | ±0.94                  | ±0.77                 | ±0.30                | ±0.46                       | ±0.53                  | ±0.50                 | ±0.24                | ±0.56                     | ±0.76                  | ±0.44                 | ±0.13                |
| Average ± SD/SE              |                   |                            |                        |                       |                      |                             |                        |                       |                      |                           |                        |                       |                      |
|                              | Max. <sup>a</sup> | 4.19                       | 5.08                   | 4.25                  | 23.34                | 5.15                        | 5.65                   | 4.10                  | 23.50                | 4.23                      | 5.04                   | 4.19                  | 22.92                |
|                              |                   | ±0.45                      | ±1.45                  | ±0.46                 | ±0.30                | ±0.81                       | ±1.14                  | ±0.42                 | ±0.32                | ±0.56                     | ±1.14                  | ±1.32                 | ±0.17                |
|                              | Min. <sup>a</sup> | 1.45                       | 1.50                   | 0.66                  | 21.87                | 1.60                        | 1.62                   | 0.90                  | 21.98                | 1.39                      | 1.44                   | 0.61                  | 21.94                |
|                              |                   | ±0.06                      | ±0.08                  | ±0.25                 | ±0.14                | ±0.18                       | ±0.18                  | ±0.23                 | ±0.40                | ±0.09                     | ±0.08                  | ±0.24                 | ±0.08                |
|                              | Mean <sup>b</sup> | 2.83                       | 3.47                   | 2.75                  | 22.41                | 3.86                        | 4.37                   | 2.77                  | 22.65                | 3.18                      | 3.57                   | 2.91                  | 22.42                |
|                              |                   | ±0.18                      | ±0.63                  | ±0.12                 | ±0.01                | ±0.02                       | ±0.26                  | ±0.05                 | ±0.23                | ±0.18                     | ±0.32                  | ±0.47                 | ±0.07                |

<sup>a</sup> Standard deviation of the mean (SD); <sup>b</sup> Standard error of the mean (SE).

**Table S4:** Estimated  $\Delta\text{RMSF}^a$  parameter of ligands/M-pro proteins across stable structure trajectories (last 20 ns).

| Sub-pocket       | Residue | Compound 6 / M-pro protein residues |                        |                        |                  | Compound 15 / M-pro protein residues |                        |                        |                  | Lopinavir / M-pro protein residues |                        |                        |                  |
|------------------|---------|-------------------------------------|------------------------|------------------------|------------------|--------------------------------------|------------------------|------------------------|------------------|------------------------------------|------------------------|------------------------|------------------|
|                  |         | 1 <sup>st</sup> MD run              | 2 <sup>nd</sup> MD run | 3 <sup>rd</sup> MD run | Mean $\pm$ SD    | 1 <sup>st</sup> MD run               | 2 <sup>nd</sup> MD run | 3 <sup>rd</sup> MD run | Mean $\pm$ SD    | 1 <sup>st</sup> MD run             | 2 <sup>nd</sup> MD run | 3 <sup>rd</sup> MD run | Mean $\pm$ SD    |
| S1'              | His41   | 0.36                                | 0.31                   | 0.39                   | 0.35 $\pm$ 0.04  | -0.70                                | -0.69                  | -2.09                  | -1.16 $\pm$ 0.81 | 0.23                               | 0.39                   | 0.35                   | 0.32 $\pm$ 0.09  |
|                  | Gly143  | -0.48                               | -0.35                  | -0.29                  | -0.37 $\pm$ 0.10 | 0.06                                 | -0.05                  | -0.14                  | -0.04 $\pm$ 0.10 | -0.37                              | -0.32                  | -0.91                  | -0.53 $\pm$ 0.33 |
|                  | Ser144  | -0.19                               | -0.19                  | -0.12                  | -0.17 $\pm$ 0.04 | -0.21                                | -0.26                  | -0.27                  | -0.24 $\pm$ 0.03 | -0.18                              | -0.11                  | -0.24                  | -0.18 $\pm$ 0.06 |
|                  | Cys145  | -0.07                               | -0.08                  | -0.01                  | -0.05 $\pm$ 0.03 | -0.33                                | -0.37                  | -0.37                  | -0.36 $\pm$ 0.03 | -0.09                              | -0.02                  | -0.16                  | -0.09 $\pm$ 0.07 |
| S1               | Phe140  | 0.12                                | 0.25                   | 0.26                   | 0.21 $\pm$ 0.08  | 0.52                                 | 0.44                   | 0.50                   | 0.49 $\pm$ 0.04  | -0.06                              | 0.04                   | -0.06                  | -0.03 $\pm$ 0.06 |
|                  | Leu141  | -0.50                               | -0.20                  | -0.23                  | -0.31 $\pm$ 0.16 | 0.28                                 | 0.14                   | 0.21                   | 0.21 $\pm$ 0.07  | -0.69                              | -0.53                  | -0.39                  | -0.53 $\pm$ 0.15 |
|                  | Asn142  | -0.69                               | -0.44                  | -0.42                  | -0.52 $\pm$ 0.15 | 0.11                                 | -0.10                  | -0.02                  | 0.001 $\pm$ 0.10 | -0.75                              | -0.74                  | -0.71                  | -0.73 $\pm$ 0.02 |
|                  | His163  | 0.43                                | 0.42                   | 0.48                   | 0.44 $\pm$ 0.03  | -0.33                                | -0.84                  | -0.29                  | -0.48 $\pm$ 0.31 | 0.45                               | 0.46                   | 0.45                   | 0.45 $\pm$ 0.01  |
|                  | Glu166  | 0.74                                | 0.65                   | 0.86                   | 0.75 $\pm$ 0.11  | 0.74                                 | 0.34                   | 0.65                   | 0.58 $\pm$ 0.21  | 0.78                               | 0.86                   | 0.84                   | 0.83 $\pm$ 0.04  |
| S2               | Met49   | 1.24                                | 1.45                   | 1.96                   | 1.55 $\pm$ 0.37  | 1.71                                 | 1.83                   | 1.64                   | 1.73 $\pm$ 0.09  | 1.33                               | 1.30                   | 1.00                   | 1.21 $\pm$ 0.18  |
|                  | Tyr54   | 0.48                                | 0.68                   | 0.70                   | 0.62 $\pm$ 0.12  | 0.23                                 | 0.34                   | 0.29                   | 0.29 $\pm$ 0.05  | 0.66                               | 0.59                   | 0.51                   | 0.59 $\pm$ 0.08  |
|                  | His164  | 0.33                                | 0.36                   | 0.42                   | 0.37 $\pm$ 0.05  | -0.29                                | -0.91                  | -0.38                  | -0.53 $\pm$ 0.34 | 0.42                               | 0.44                   | 0.43                   | 0.43 $\pm$ 0.01  |
|                  | Asp187  | 0.91                                | 0.94                   | 1.01                   | 0.95 $\pm$ 0.05  | 0.51                                 | 0.54                   | 0.59                   | 0.55 $\pm$ 0.04  | 0.75                               | 0.82                   | 0.93                   | 0.84 $\pm$ 0.09  |
|                  | Arg188  | 0.78                                | 0.84                   | 0.96                   | 0.86 $\pm$ 0.09  | 0.63                                 | 0.43                   | 0.45                   | 0.50 $\pm$ 0.11  | 0.76                               | 0.36                   | 0.68                   | 0.60 $\pm$ 0.22  |
| S3               | Met165  | 0.31                                | 0.09                   | 0.42                   | 0.27 $\pm$ 0.17  | 0.01                                 | -0.60                  | -0.13                  | -0.24 $\pm$ 0.32 | 0.46                               | 0.47                   | 0.35                   | 0.43 $\pm$ 0.07  |
|                  | Leu167  | 0.70                                | 0.45                   | 0.91                   | 0.69 $\pm$ 0.23  | 1.01                                 | 0.74                   | 0.92                   | 0.89 $\pm$ 0.14  | 0.73                               | 0.79                   | 0.71                   | 0.74 $\pm$ 0.04  |
|                  | Gln189  | 0.49                                | 0.40                   | 0.77                   | 0.55 $\pm$ 0.20  | 0.71                                 | 0.46                   | 0.53                   | 0.56 $\pm$ 0.13  | -0.40                              | -0.03                  | 0.36                   | -0.02 $\pm$ 0.38 |
|                  | Thr190  | 0.15                                | 0.01                   | 0.47                   | 0.21 $\pm$ 0.24  | 0.35                                 | 0.20                   | 0.21                   | 0.25 $\pm$ 0.09  | -1.46                              | -0.24                  | 0.05                   | -0.55 $\pm$ 0.80 |
|                  | Gln192  | 0.02                                | 0.00                   | 0.32                   | 0.11 $\pm$ 0.18  | -0.34                                | -0.06                  | 0.06                   | -0.11 $\pm$ 0.21 | -1.84                              | -0.09                  | 0.15                   | -0.59 $\pm$ 1.09 |
| Vicinal residues | Pro39   | 0.49                                | 0.57                   | 0.60                   | 0.55 $\pm$ 0.06  | -0.48                                | 0.01                   | -0.23                  | -0.23 $\pm$ 0.25 | 0.51                               | 0.60                   | 0.49                   | 0.53 $\pm$ 0.06  |
|                  | Val42   | 1.14                                | 1.09                   | 1.19                   | 1.14 $\pm$ 0.05  | -0.06                                | 0.01                   | -1.19                  | -0.41 $\pm$ 0.67 | 1.06                               | 1.18                   | 1.09                   | 1.11 $\pm$ 0.06  |
|                  | Ile43   | 1.71                                | 1.73                   | 1.80                   | 1.75 $\pm$ 0.04  | 0.89                                 | 0.85                   | 0.73                   | 0.82 $\pm$ 0.08  | 1.72                               | 1.76                   | 1.66                   | 1.71 $\pm$ 0.05  |

|        |       |       |      |               |       |      |       |                |      |      |       |               |
|--------|-------|-------|------|---------------|-------|------|-------|----------------|------|------|-------|---------------|
| Cys44  | 2.14  | 2.15  | 2.42 | 2.24<br>±0.16 | 1.68  | 2.13 | 1.36  | 1.72<br>±0.38  | 2.22 | 2.37 | 2.18  | 2.25<br>±0.10 |
| Thr45  | 1.89  | 1.51  | 2.27 | 1.89<br>±0.38 | 1.43  | 2.30 | 1.34  | 1.69<br>±0.53  | 1.79 | 2.30 | 1.59  | 1.89<br>±0.36 |
| Ser46  | 1.52  | 1.20  | 2.10 | 1.60<br>±0.46 | 0.79  | 2.29 | 1.38  | 1.49<br>±0.76  | 1.84 | 1.68 | 1.36  | 1.62<br>±0.24 |
| Glu47  | 2.04  | 2.36  | 2.76 | 2.39<br>±0.36 | 1.69  | 3.12 | 1.33  | 2.05<br>±0.95  | 1.71 | 1.99 | 1.98  | 1.89<br>±0.16 |
| Asp48  | 1.80  | 1.44  | 2.41 | 1.89<br>±0.49 | 1.81  | 2.12 | 1.86  | 1.93<br>±0.17  | 0.71 | 1.63 | 1.17  | 1.17<br>±0.46 |
| Leu50  | 0.69  | 1.09  | 1.66 | 1.15<br>±0.49 | 1.34  | 1.39 | 1.18  | 1.30<br>±0.11  | 1.28 | 0.51 | 0.13  | 0.64<br>±0.59 |
| Asn53  | -0.03 | 0.53  | 0.06 | 0.18<br>±0.30 | 0.61  | 0.47 | 0.43  | 0.51<br>±0.09  | 0.42 | 0.00 | -0.03 | 0.13<br>±0.25 |
| Pro168 | 0.05  | -0.24 | 0.45 | 0.09<br>±0.34 | 0.75  | 0.68 | 0.68  | 0.70<br>±0.04  | 0.24 | 0.16 | -0.03 | 0.13<br>±0.14 |
| Phe185 | 0.36  | 0.40  | 0.52 | 0.43<br>±0.08 | -0.51 | 0.05 | -0.34 | -0.27<br>±0.29 | 0.27 | 0.35 | 0.49  | 0.37<br>±0.11 |
| Val186 | 0.66  | 0.70  | 0.84 | 0.73<br>±0.10 | -0.24 | 0.12 | 0.11  | 0.001<br>±0.20 | 0.55 | 0.49 | 0.74  | 0.59<br>±0.13 |

<sup>a</sup> Relative difference root-mean-square fluctuation ( $\Delta$ RMSF) estimated for each ligand-bound protein relative to the apo state of COVID-19 M-pro. Only values with significant mobility changes ( $\Delta$ RMSF > 0.3 Å) are represented in bold.

**Table S5.** Estimated RMSD and Rg parameter of investigated ligands and reference compound, Benzopurpurin 4B, complexed with Nsp15 NendoU proteins throughout the triplicate all-atom MD simulation

|                        |                   | Compound 6 / Nsp15 NendoU complex |                  |                 |                | Compound 15 / Nsp15 NendoU complex |                  |                 |                | Benzopurpurin 4B / Nsp15 NendoU complex |                  |                 |                |
|------------------------|-------------------|-----------------------------------|------------------|-----------------|----------------|------------------------------------|------------------|-----------------|----------------|-----------------------------------------|------------------|-----------------|----------------|
|                        |                   | RMSD protein (Å)                  | RMSD complex (Å) | RMSD ligand (Å) | Rg complex (Å) | RMSD protein (Å)                   | RMSD complex (Å) | RMSD ligand (Å) | Rg complex (Å) | RMSD protein (Å)                        | RMSD complex (Å) | RMSD ligand (Å) | Rg complex (Å) |
| 1 <sup>st</sup> MD run | Max.              | 4.16                              | 4.77             | 4.80            | 24.89          | 4.64                               | 5.07             | 4.52            | 24.75          | 4.57                                    | 5.40             | 4.26            | 25.00          |
|                        | Min.              | 1.45                              | 1.72             | 1.83            | 23.39          | 2.02                               | 2.01             | 1.54            | 23.21          | 1.85                                    | 1.86             | 0.98            | 23.40          |
|                        | Mean <sup>a</sup> | 2.61                              | 3.55             | 3.59            | 23.931         | 2.79                               | 4.01             | 3.55            | 23.80          | 2.69                                    | 4.00             | 2.98            | 23.96          |
|                        |                   | ±0.32                             | ±0.41            | ±0.32           | ±0.20          | ±0.30                              | ±0.37            | ±0.36           | ±0.20          | ±0.31                                   | ±0.42            | ±0.47           | ±0.19          |
| 2 <sup>nd</sup> MD run | Max.              | 4.03                              | 5.11             | 4.92            | 24.58          | 4.82                               | 6.10             | 4.85            | 25.44          | 4.57                                    | 4.77             | 4.80            | 24.82          |
|                        | Min.              | 1.69                              | 1.79             | 1.83            | 23.40          | 1.64                               | 1.89             | 2.11            | 23.41          | 1.67                                    | 1.67             | 0.96            | 23.36          |
|                        | Mean <sup>a</sup> | 2.55                              | 3.00             | 4.07            | 23.87          | 2.82                               | 4.29             | 3.32            | 24.02          | 2.63                                    | 2.83             | 2.94            | 23.84          |
|                        |                   | ±0.27                             | ±0.42            | ±0.45           | ±0.19          | ±0.36                              | ±0.51            | ±0.41           | ±0.31          | ±0.36                                   | ±0.36            | ±0.32           | ±0.18          |
| 3 <sup>rd</sup> MD run | Max.              | 4.23                              | 5.07             | 4.80            | 25.12          | 4.81                               | 4.87             | 5.44            | 25.17          | 4.12                                    | 4.55             | 4.26            | 25.26          |
|                        | Min.              | 1.79                              | 2.01             | 1.76            | 23.32          | 1.89                               | 2.01             | 1.59            | 23.35          | 1.66                                    | 1.82             | 1.00            | 23.42          |
|                        | Mean <sup>a</sup> | 2.72                              | 4.01             | 3.59            | 23.89          | 2.65                               | 3.95             | 4.12            | 24.01          | 2.70                                    | 3.41             | 2.98            | 23.92          |
|                        |                   | ±0.37                             | ±0.37            | ±0.32           | ±0.25          | ±0.41                              | ±0.31            | ±0.44           | ±0.30          | ±0.35                                   | ±0.28            | ±0.47           | ±0.24          |
| Average ± SD/SE        |                   |                                   |                  |                 |                |                                    |                  |                 |                |                                         |                  |                 |                |
|                        | Max. <sup>a</sup> | 4.14                              | 4.98             | 4.84            | 24.86          | 4.76                               | 5.34             | 4.94            | 25.12          | 4.42                                    | 4.91             | 4.44            | 25.03          |
|                        |                   | ±0.10                             | ±0.18            | ±0.07           | ±0.27          | ±0.10                              | ±0.66            | ±0.46           | ±0.35          | ±0.26                                   | ±0.44            | ±0.31           | ±0.22          |
|                        | Min. <sup>a</sup> | 1.64                              | 1.84             | 1.81            | 23.37          | 1.85                               | 1.97             | 1.75            | 23.32          | 1.73                                    | 1.87             | 0.50            | 23.39          |
|                        |                   | ±0.17                             | ±0.15            | ±0.04           | ±0.04          | ±0.19                              | ±0.07            | ±0.32           | ±0.10          | ±0.11                                   | ±0.10            | ±0.03           | ±0.03          |
|                        | Mean <sup>b</sup> | 2.62                              | 3.52             | 3.75            | 23.90          | 2.75                               | 4.08             | 3.66            | 23.95          | 2.67                                    | 3.41             | 2.97            | 23.91          |
|                        |                   | ±0.19                             | ±0.23            | ±0.21           | ±0.12          | ±0.21                              | ±0.23            | ±0.23           | ±0.16          | ±0.20                                   | ±0.20            | ±0.24           | ±0.12          |

<sup>a</sup> Standard deviation of the mean (SD); <sup>b</sup> Standard error of the mean (SE).

**Table S6:** Estimated  $\Delta\text{RMSF}^a$  parameter of ligands/Nsp15 NendoU bound proteins across stable structure trajectories (last 20 ns).

| Sub-pocket       | Residue | Compound 6 / Nsp15 NendoU protein residues |                        |                        |                  | Compound 15 / M-pro protein residues |                        |                        |                  | Lopinavir / M-pro protein residues |                        |                        |                  |
|------------------|---------|--------------------------------------------|------------------------|------------------------|------------------|--------------------------------------|------------------------|------------------------|------------------|------------------------------------|------------------------|------------------------|------------------|
|                  |         | 1 <sup>st</sup> MD run                     | 2 <sup>nd</sup> MD run | 3 <sup>rd</sup> MD run | Mean $\pm$ SD    | 1 <sup>st</sup> MD run               | 2 <sup>nd</sup> MD run | 3 <sup>rd</sup> MD run | Mean $\pm$ SD    | 1 <sup>st</sup> MD run             | 2 <sup>nd</sup> MD run | 3 <sup>rd</sup> MD run | Mean $\pm$ SD    |
| B0               | Asn278  | 0.09                                       | 0.12                   | -0.98                  | -0.26 $\pm$ 0.62 | -0.09                                | 0.11                   | 0.10                   | 0.04 $\pm$ 0.11  | -0.02                              | -0.06                  | -0.03                  | -0.04 $\pm$ 0.02 |
|                  | Lys345  | 1.53                                       | 0.74                   | 0.88                   | 1.05 $\pm$ 0.42  | 1.21                                 | 1.19                   | 1.58                   | 1.32 $\pm$ 0.22  | 0.71                               | -0.03                  | 1.14                   | 0.61 $\pm$ 0.59  |
|                  | Leu346  | 1.42                                       | 0.10                   | 0.34                   | 0.62 $\pm$ 0.70  | 0.48                                 | 0.30                   | 1.02                   | 0.66 $\pm$ 0.59  | 1.02                               | 1.02                   | 1.03                   | 1.02 $\pm$ 0.006 |
| B1               | Gln245  | -0.28                                      | -0.18                  | -1.40                  | -0.62 $\pm$ 0.68 | -0.38                                | -0.21                  | -0.03                  | -0.21 $\pm$ 0.18 | 0.11                               | -0.13                  | 0.07                   | 0.01 $\pm$ 0.13  |
|                  | Gly248  | -0.06                                      | -0.03                  | -0.53                  | -0.21 $\pm$ 0.28 | -0.07                                | -0.06                  | 0.13                   | 0.15 $\pm$ 0.11  | 0.23                               | 0.08                   | 0.05                   | 0.12 $\pm$ 0.10  |
|                  | His250  | 0.01                                       | -0.01                  | -0.35                  | -0.12 $\pm$ 0.20 | -0.06                                | 0.10                   | 0.06                   | 0.01 $\pm$ 0.09  | 0.07                               | 0.00                   | 0.06                   | 0.04 $\pm$ 0.04  |
|                  | Lys290  | 0.44                                       | 0.31                   | 0.17                   | 0.31 $\pm$ 0.14  | 0.37                                 | 0.20                   | 0.39                   | 0.32 $\pm$ 0.10  | -0.01                              | -0.13                  | -0.03                  | -0.06 $\pm$ 0.07 |
|                  | Ser294  | -0.09                                      | 0.02                   | -0.73                  | -0.27 $\pm$ 0.40 | -0.22                                | 0.02                   | -0.05                  | -0.09 $\pm$ 0.13 | 0.07                               | -0.05                  | 0.01                   | 0.01 $\pm$ 0.06  |
|                  | Tyr343  | 0.11                                       | -0.09                  | -0.19                  | -0.06 $\pm$ 0.15 | 0.02                                 | -0.08                  | 0.17                   | 0.04 $\pm$ 0.12  | -0.04                              | -0.04                  | 0.10                   | 0.002 $\pm$ 0.08 |
| B2               | His235  | -0.17                                      | -0.18                  | -0.62                  | -0.33 $\pm$ 0.26 | -0.28                                | -0.05                  | -0.14                  | -0.16 $\pm$ 0.12 | 0.16                               | -0.01                  | 0.01                   | 0.05 $\pm$ 0.09  |
|                  | Gly247  | -0.14                                      | -0.07                  | -0.75                  | -0.32 $\pm$ 0.38 | -0.21                                | -0.03                  | 0.16                   | -0.03 $\pm$ 0.18 | 0.21                               | 0.02                   | 0.02                   | 0.08 $\pm$ 0.11  |
|                  | Trp333  | 0.25                                       | -0.04                  | -0.10                  | 0.04 $\pm$ 0.19  | 0.33                                 | 0.27                   | 0.38                   | 0.33 $\pm$ 0.06  | 0.19                               | -0.03                  | 0.22                   | 0.12 $\pm$ 0.14  |
|                  | Thr341  | -0.06                                      | -0.20                  | -0.49                  | -0.25 $\pm$ 0.22 | -0.04                                | -0.05                  | 0.08                   | -0.01 $\pm$ 0.07 | 0.15                               | -0.04                  | 0.11                   | 0.07 $\pm$ 0.10  |
| B3               | Asp240  | 0.65                                       | 0.71                   | 0.13                   | 0.50 $\pm$ 0.32  | 0.68                                 | 0.77                   | 0.89                   | 0.78 $\pm$ 0.11  | 0.72                               | 0.53                   | 0.65                   | 0.63 $\pm$ 0.10  |
|                  | His243  | 0.52                                       | 0.62                   | 0.24                   | 0.46 $\pm$ 0.20  | 0.52                                 | 0.62                   | 0.79                   | 0.64 $\pm$ 0.13  | 0.72                               | 0.49                   | 0.71                   | 0.64 $\pm$ 0.13  |
|                  | Glu340  | -0.09                                      | -0.18                  | -0.64                  | -0.03 $\pm$ 0.30 | -0.02                                | -0.05                  | 0.12                   | 0.01 $\pm$ 0.09  | 0.19                               | 0.00                   | 0.18                   | 0.13 $\pm$ 0.11  |
| Vicinal residues | Leu215  | 0.39                                       | 0.48                   | 0.36                   | 0.41 $\pm$ 0.06  | 0.28                                 | 0.42                   | 0.45                   | 0.38 $\pm$ 0.09  | 0.21                               | 0.13                   | 0.20                   | 0.18 $\pm$ 0.05  |
|                  | Ile223  | 0.47                                       | 0.61                   | 0.21                   | 0.43 $\pm$ 0.21  | 0.40                                 | 0.51                   | 0.52                   | 0.48 $\pm$ 0.07  | 0.23                               | 0.18                   | 0.19                   | 0.20 $\pm$ 0.03  |
|                  | Tyr226  | 0.28                                       | 0.40                   | 0.05                   | 0.24 $\pm$ 0.18  | 0.27                                 | 0.33                   | 0.35                   | 0.31 $\pm$ 0.04  | 0.17                               | 0.16                   | 0.17                   | 0.17 $\pm$ 0.01  |
|                  | Leu228  | 0.23                                       | 0.43                   | 0.06                   | 0.24 $\pm$ 0.18  | 0.29                                 | 0.38                   | 0.38                   | 0.35 $\pm$ 0.05  | 0.22                               | 0.17                   | 0.11                   | 0.17 $\pm$ 0.05  |
|                  | Gly239  | 0.34                                       | 0.31                   | -0.09                  | 0.19 $\pm$ 0.24  | 0.29                                 | 0.41                   | 0.48                   | 0.39 $\pm$ 0.10  | 0.36                               | 0.16                   | 0.26                   | 0.26 $\pm$ 0.10  |



|        |             |             |       |                             |             |             |             |                             |             |             |             |                             |
|--------|-------------|-------------|-------|-----------------------------|-------------|-------------|-------------|-----------------------------|-------------|-------------|-------------|-----------------------------|
| Phe241 | <b>1.07</b> | <b>1.17</b> | 0.21  | <b>0.82</b><br><b>±0.53</b> | <b>1.14</b> | <b>1.20</b> | <b>1.36</b> | <b>1.23</b><br><b>±0.11</b> | <b>1.14</b> | <b>0.91</b> | <b>1.05</b> | <b>1.03</b><br><b>±0.12</b> |
| Ser242 | <b>0.77</b> | <b>0.89</b> | -0.28 | <b>0.46</b><br><b>±0.64</b> | <b>0.83</b> | <b>0.86</b> | <b>1.04</b> | <b>0.91</b><br><b>±0.11</b> | <b>0.94</b> | <b>0.74</b> | <b>0.94</b> | <b>0.87</b><br><b>±0.11</b> |
| Leu332 | 0.20        | -0.01       | 0.11  | 0.10<br>±0.10               | <b>0.32</b> | <b>0.30</b> | <b>0.36</b> | <b>0.33</b><br><b>±0.03</b> | 0.21        | -0.06       | 0.22        | 0.13<br>±0.16               |
| Cys334 | <b>0.50</b> | 0.24        | 0.01  | 0.25<br>±0.24               | <b>0.58</b> | <b>0.41</b> | <b>0.64</b> | <b>0.54</b><br><b>±0.12</b> | 0.24        | -0.05       | 0.27        | 0.15<br>±0.18               |
| Lys335 | 0.23        | 0.01        | -0.61 | -0.12<br>±0.43              | 0.29        | 0.05        | <b>0.34</b> | 0.23<br>±0.16               | 0.26        | -0.03       | 0.36        | 0.19<br>±0.20               |

<sup>a</sup> Relative difference root-mean-square fluctuation ( $\Delta$ RMSF) estimated for each ligand-bound protein relative to the apo state of COVID-19 Nsp15 NendoU. Only values with significant mobility changes ( $\Delta$ RMSF > 0.3 Å) are represented in bold.

**Table S7.** Total binding-free energies and individual energy term ( $\Delta G \pm SD$ ) of the promising scalarane-based compounds and reference ligands within Nsp15 NendoU and/or M-pro protein binding site, across the three MD simulation runs.

| Energy<br>(kJ/mol $\pm$ SD) |                  | M-pro complex          |                        |                        | Nsp15 NendoU complex   |                       |                        |
|-----------------------------|------------------|------------------------|------------------------|------------------------|------------------------|-----------------------|------------------------|
|                             |                  | Comp. 6                | Comp. 15               | Lopinavir              | Comp. 6                | Comp. 15              | Benzopurpurin 4B       |
| 1 <sup>st</sup> MD run      | van der Waal     | -110.60<br>$\pm$ 18.86 | -119.83<br>$\pm$ 11.25 | -215.43<br>$\pm$ 19.69 | -102.33<br>$\pm$ 14.27 | -80.21<br>$\pm$ 11.17 | -117.31<br>$\pm$ 20.19 |
|                             | Electrostatic    | -13.65<br>$\pm$ 26.693 | -13.82<br>$\pm$ 18.22  | -26.62<br>$\pm$ 20.49  | -46.560<br>$\pm$ 13.84 | -8.39<br>$\pm$ 17.01  | -82.22<br>$\pm$ 33.47  |
|                             | Solvation; Polar | 70.06<br>$\pm$ 32.18   | 85.87<br>$\pm$ 23.47   | 160.01<br>$\pm$ 35.13  | 115.28<br>$\pm$ 24.61  | 26.98<br>$\pm$ 35.32  | 143.16<br>$\pm$ 42.38  |
|                             | Solvation; SASA  | -13.50<br>$\pm$ 1.49   | -14.76<br>$\pm$ 1.44   | -21.76<br>$\pm$ 1.83   | -12.78<br>$\pm$ 1.20   | -11.80<br>$\pm$ 1.80  | -17.89<br>$\pm$ 2.87   |
|                             | Binding energy   | -67.69<br>$\pm$ 16.45  | -62.53<br>$\pm$ 12.37  | -103.81<br>$\pm$ 31.62 | -46.43<br>$\pm$ 27.21  | -73.42<br>$\pm$ 25.24 | -74.26<br>$\pm$ 34.28  |
| 2 <sup>nd</sup> MD run      | van der Waal     | -149.98<br>$\pm$ 21.32 | -105.14<br>$\pm$ 22.53 | -178.95<br>$\pm$ 33.26 | -95.76<br>$\pm$ 15.75  | -75.83<br>$\pm$ 32.75 | -105.49<br>$\pm$ 21.29 |
|                             | Electrostatic    | -6.94<br>$\pm$ 10.30   | -20.54<br>$\pm$ 19.49  | -32.07<br>$\pm$ 14.69  | -56.13<br>$\pm$ 8.54   | -10.13<br>$\pm$ 4.11  | -112.62<br>$\pm$ 4.91  |
|                             | Solvation; Polar | 87.58<br>$\pm$ 11.60   | 62.37<br>$\pm$ 35.58   | 146.35<br>$\pm$ 28.35  | 105.52<br>$\pm$ 14.81  | 16.20<br>$\pm$ 51.13  | 153.72<br>$\pm$ 44.05  |
|                             | Solvation; SASA  | -16.28<br>$\pm$ 1.04   | -11.12<br>$\pm$ 3.01   | -19.69<br>$\pm$ 2.84   | -12.75<br>$\pm$ 1.71   | -6.65<br>$\pm$ 3.33   | -14.05<br>$\pm$ 2.22   |
|                             | Binding energy   | -85.63<br>$\pm$ 16.05  | -74.44<br>$\pm$ 19.91  | -84.36<br>$\pm$ 21.68  | -59.12<br>$\pm$ 14.68  | -76.41<br>$\pm$ 43.76 | -78.44<br>$\pm$ 22.75  |
| 3 <sup>rd</sup> MD run      | van der Waal     | -138.19<br>$\pm$ 14.81 | -95.14<br>$\pm$ 22.06  | -174.33<br>$\pm$ 12.35 | -98.08<br>$\pm$ 10.69  | -99.74<br>$\pm$ 18.93 | -110.28<br>$\pm$ 34.65 |
|                             | Electrostatic    | -7.46<br>$\pm$ 12.43   | -8.81<br>$\pm$ 10.97   | -35.98<br>$\pm$ 14.71  | -53.16<br>$\pm$ 18.98  | -4.63<br>$\pm$ 6.50   | -112.53<br>$\pm$ 28.68 |
|                             | Solvation; Polar | 86.31<br>$\pm$ 10.14   | 43.24<br>$\pm$ 35.17   | 140.20<br>$\pm$ 20.91  | 120.34<br>$\pm$ 27.70  | 32.90<br>$\pm$ 50.22  | 173.66<br>$\pm$ 42.55  |
|                             | Solvation; SASA  | -16.46<br>$\pm$ 1.46   | -7.40<br>$\pm$ 3.19    | -20.51<br>$\pm$ 1.09   | -12.74<br>$\pm$ 1.25   | -12.31<br>$\pm$ 1.88  | -16.62<br>$\pm$ 3.53   |
|                             | Binding energy   | -75.79<br>$\pm$ 17.85  | -68.11<br>$\pm$ 37.80  | -90.62<br>$\pm$ 21.23  | -43.65<br>$\pm$ 18.04  | -83.78<br>$\pm$ 32.28 | -65.78<br>$\pm$ 35.29  |

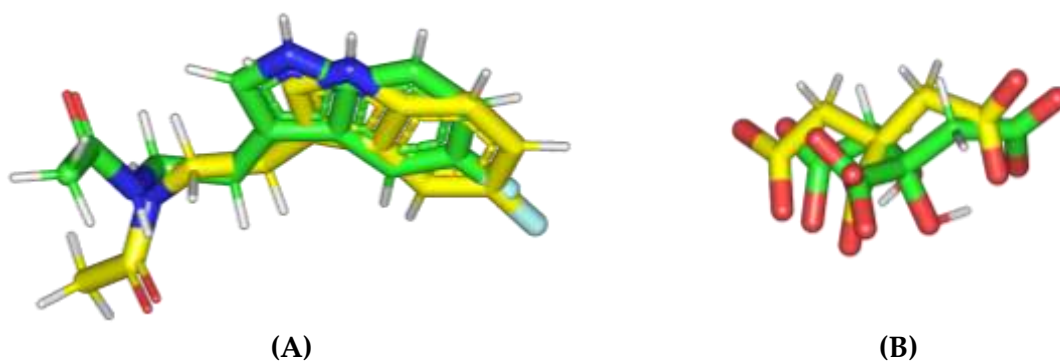

**Figure S1.** Superimposing the crystallized (green sticks) and redocked (yellow sticks) ligands at **(A)** M-pro and **(B)** Nsp15 NendoU for validating the adopted directed docking protocol.

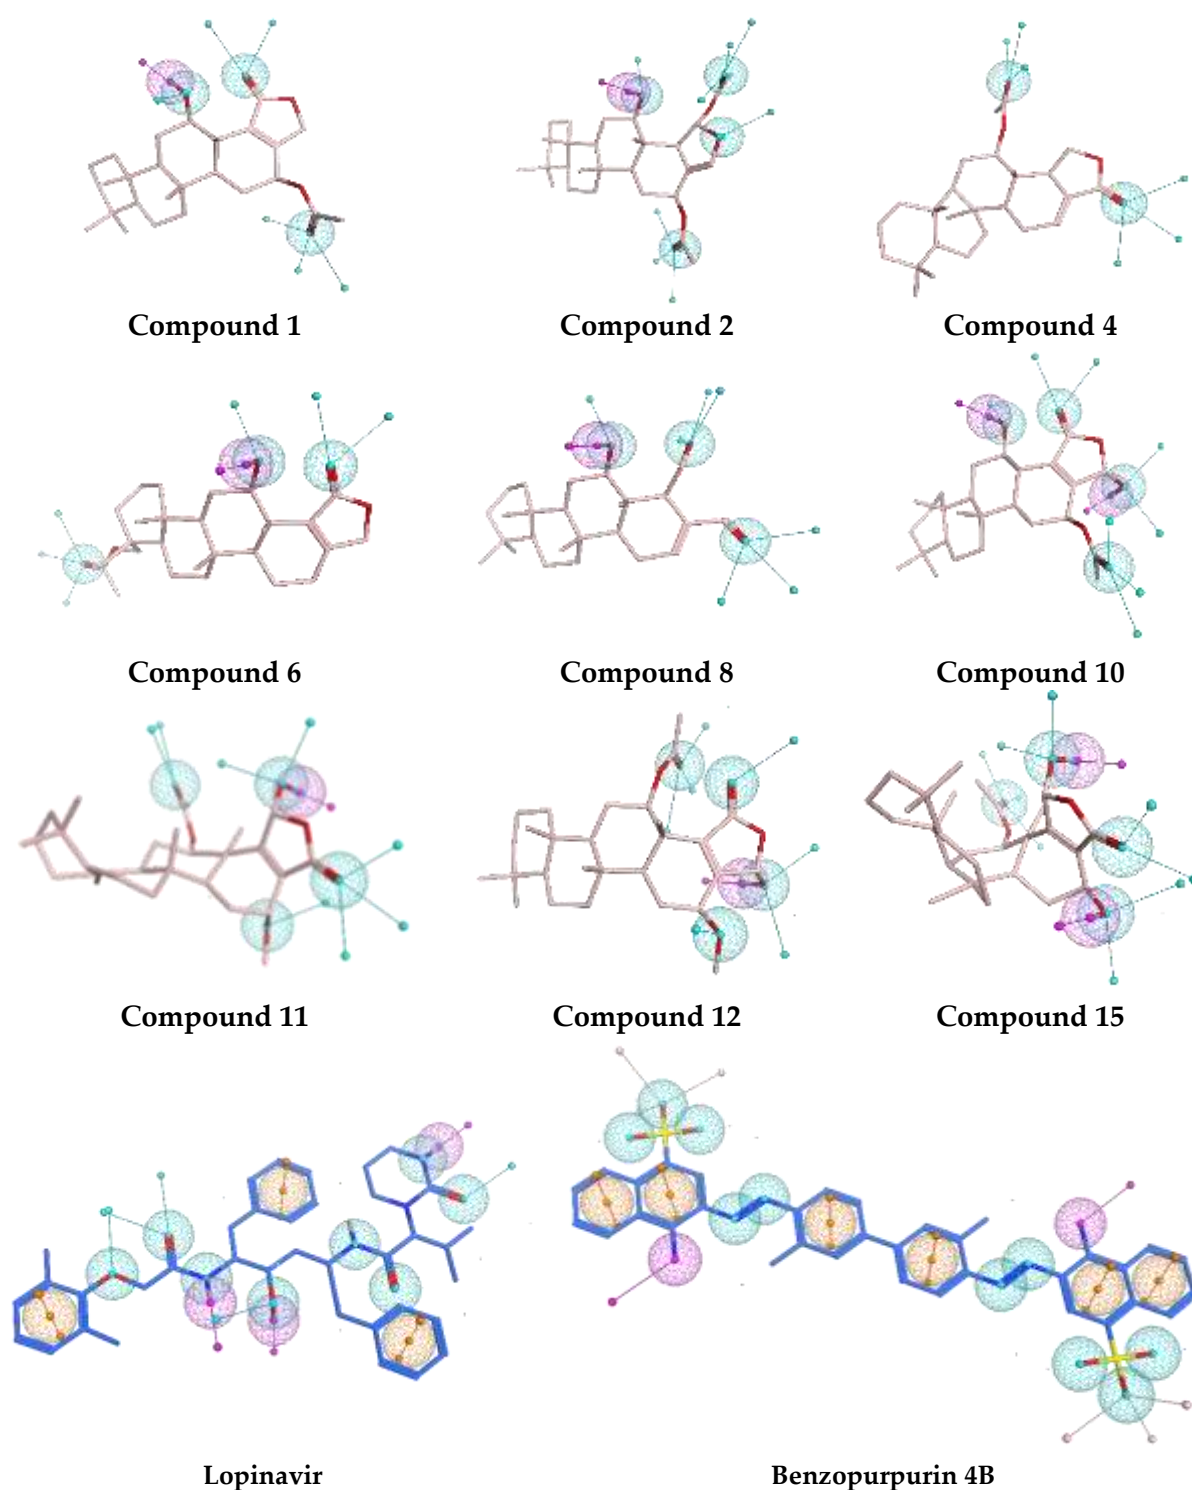

**Figure S2.** The 3D structural representation of the promising scalarane-based hits (sticks) and reference ligands showing respective pharmacophoric features (mesh spheres) as well as projected virtual points (arrows). Features and directionality of H-bond donor, H-bond acceptor, or aromaticity are colored in violet, cyan, or orange, respectively.
